# Supplementary material for: Innate Immune Response to Fasting and Refeeding in the Zebrafish Kidney
Source: MDPI journal article supplement (doi:10.3390/biom11060825), 2021-06-01
Supplement: s1 [file s1]

Table S1 List of primers used in this study

| qRT-PCR<br>Primer | Primer sequence (5' to 3')<br>(Forward) | Primer sequence (5' to 3') (Reverse) | ID             |
|-------------------|-----------------------------------------|--------------------------------------|----------------|
| ef1 $\alpha$      | GCTCGTTTTGAGGAAATCACC                   | CCATCCTGAAATTGGGACGAA                | AY422992.1     |
| nfk $\beta$ 1     | TGAGTAAAGTGTGGAGGAGC                    | GTCAGGCAGGAACGCAGT                   | NM_001353873   |
| nfk $\beta$ 2     | GATGAGAACGGAGACACGC                     | CTCTACTAACTTGGGTGCTT                 | NM_001001840.3 |
| arg2              | CGGCGGACTGACCTACA                       | CCAGAGCGGATGCAACTA                   | NM_199611.3    |
| havcr1            | AGTTCTTGTGCCTGTTCTC                     | ACTGTTCGTATTCGCTTT                   | NM_001002434.1 |
| il-1 $\beta$      | CTCGTACTCAAGGAGATC                      | CAGCTCGAAGTTAATGATG                  | NM_212844.2    |
| tgfb1a            | CCAGCAGAGCACGGATAAG                     | AGAGTTGCCATTTGAAGG                   | NM_182873.1    |
| tgfb1b            | AACTCACGCTTCATTTCCCTTC                  | CTTGGTCCGCTAAGAGGC                   | XM_687246.8    |
| mmp9              | CCTGCCAAATCAAGGAGT                      | ACCTTTGCGTTCCACCATT                  | AY151254.1     |
| nrf2a             | GGAAGTCCATAACCGAAGAC                    | TGGGAATATCTCATTGTAATCTGAC            | NM_182889      |

Table S2 The statistic result of experiment

| Figure     | group   | Test of normality<br>(normal distributions or not) | df | F-value | Hmogeneity of variance test<br>(variance equal or not) | parametric tests | post hoc multiple comparisons | p-value |
|------------|---------|----------------------------------------------------|----|---------|--------------------------------------------------------|------------------|-------------------------------|---------|
| Figure 1 A | 7 days  | Yes                                                | 42 | 2.221   | Yes                                                    | t-test           | -                             | p=0.002 |
|            | 14 days | No                                                 | 44 | -       | -                                                      | Mann-Whitney U   | -                             | p=0.205 |
| Figure 1 B | 7 days  | No                                                 | 44 | -       | -                                                      | Mann-Whitney U   | -                             | p=0.008 |
|            | 14 days | No                                                 | 44 | -       | -                                                      | Mann-Whitney U   | -                             | p=0.000 |
|            | 21 days | No                                                 | 44 | -       | -                                                      | Mann-Whitney U   | -                             | p=0.044 |
|            | 28 days | No                                                 | 44 | -       | -                                                      | Mann-Whitney U   | -                             | p=0.380 |
| Figure 1 C | 7 days  | No                                                 | 44 | -       | -                                                      | Mann-Whitney U   | -                             | p=0.015 |

|            |                    |     |    |       |     |                |            |                                                                    |
|------------|--------------------|-----|----|-------|-----|----------------|------------|--------------------------------------------------------------------|
|            | 14 days            | Yes | 41 | 0.083 | Yes | t-test         | -          | p=0.000                                                            |
|            | 21 days            | Yes | 41 | 1.705 | Yes | t-test         | -          | p=0.000                                                            |
|            | 28 days            | Yes | 41 | 1.49  | Yes | t-test         | -          | p=0.007                                                            |
|            | 35 days            | Yes | 41 | 1.49  | Yes | t-test         | -          | p=0.457                                                            |
| Figure 1 D | -                  | Yes | 8  | 3.331 | Yes | one-way ANOVA  | Bonferroni | F24 - S24: p=0.143<br>F24 - S21R3: p=0.337<br>S24 - S21R3: p=1.000 |
| Figure 2 B | -                  | No  | 22 | -     | -   | Kruskal-Wallis | -          | S21R3 - S21R14: p=0.048<br>S21R5 - S21R14: p=0.01                  |
| Figure 2 C | -                  | No  | 22 |       | -   | Kruskal-Wallis | -          | p=0.054                                                            |
| Figure 2 D | F21 and S21        | Yes | 18 | 1.247 | Yes | t-test         | -          | p=0.055                                                            |
|            | F24, S24 and S21R3 | Yes | 28 | 5.343 | No  | Dunnett's T3   | -          | F24 - S24: p=0.064<br>F24 - S21R3: p=1.000<br>S24 - S21R3: p=0.070 |
|            | F28, S28 and S21R7 | No  | 30 | -     | -   | Kruskal-Wallis | -          | F28 - S28: p=0.015<br>F28 - S21R7: p=1.000<br>S28 - S21R7: p=0.015 |
| Figure 3 A | F21 and S21        | Yes | 13 | 0.086 | Yes | t-test         | -          | p=0.046                                                            |
|            | F24, S24 and S21R3 | Yes | 23 | 5.526 | Yes | one-way ANOVA  | Bonferroni | F24 - S24: p=0.057<br>F24 - S21R3: p=1.000<br>S24 - S21R3: p=0.016 |
|            | F28, S28 and S21R7 | No  | 24 | -     | -   | Kruskal-Wallis | -          | F28 - S28: p=0.208<br>F28 - S21R7: p=0.103<br>S28 - S21R7: p=0.002 |
| Figure 3 B | F21 and S21        | No  | 20 | -     | -   | Mann-Whitney U | -          | p=0.019                                                            |

|            |                    |     |    |        |     |                |             |                                                                    |
|------------|--------------------|-----|----|--------|-----|----------------|-------------|--------------------------------------------------------------------|
|            | F24, S24 and S21R3 | No  | 27 | -      | -   | Kruskal-Wallis | -           | F24 - S24: p=0.000<br>F24 - S21R3: p=0.041<br>S24 - S21R3: p=0.413 |
|            | F28, S28 and S21R7 | No  | 25 | -      | -   | Kruskal-Wallis | -           | p=0.085                                                            |
| Figure 3 C | F21 and S21        | No  | 18 | -      | -   | Mann-Whitney U | -           | p=0.040                                                            |
|            | F24, S24 and S21R3 | No  | 26 | -      | -   | Mann-Whitney U | -           | p=0.646                                                            |
|            | F28, S28 and S21R7 | Yes | 27 | 0.824  | Yes | one-way ANOVA  | Bonferroni  | p=450                                                              |
| Figure 4 A | F21 and S21        | Yes | 18 | 8.927  | No  | t-test         | -           | p=0.000757                                                         |
|            | F24, S24 and S21R3 | Yes | 25 | 59.978 | No  | one-way ANOVA  | Dunnet's T3 | F24 - S24: p=0.000<br>F24 - S21R3: p=0.000<br>S24 - S21R3: p=0.000 |
|            | F28, S28 and S21R7 | No  | 24 | -      | -   | Kruskal-Wallis | -           | F28 - S28: p=0.000<br>F28 - S21R7: p=0.402<br>S28 - S21R7: p=0.002 |
| Figure 4 B | F21 and S21        | Yes | 13 | 0.797  | Yes | t-test         | -           | p=0.102                                                            |
|            | F24, S24 and S21R3 | Yes | 23 | 9.558  | Yes | one-way ANOVA  | Bonferroni  | F24 - S24: p=0.006<br>F24 - S21R3: p=1.000<br>S24 - S21R3: p=0.002 |
|            | F28, S28 and S21R7 | No  | 30 | -      | -   | Kruskal-Wallis | -           | F28 - S28: p=0.002<br>F28 - S21R7: p=0.780<br>S28 - S21R7: p=0.004 |
| Figure 4 C | F21 and S21        | Yes | 18 | 2.646  | Yes | t-test         |             | p=0.004                                                            |
|            | F24, S24 and S21R3 | Yes | 29 | 12.828 | Yes | one-way ANOVA  | Bonferroni  | F24 - S24: p=0.000<br>F24 - S21R3: p=0.038<br>S24 - S21R3: p=0.072 |

|             |                    |     |    |        |     |                |            |                                                                    |
|-------------|--------------------|-----|----|--------|-----|----------------|------------|--------------------------------------------------------------------|
|             | F28, S28 and S21R7 | Yes | 29 | 8.824  | Yes | one-way ANOVA  | Bonferroni | F28 - S28: p=0.001<br>F28 - S21R7: p=0.066<br>S28 - S21R7: p=0.273 |
| Figure 5 A  | F21 and S21        | Yes | 18 | 0.337  | Yes | t-test         | -          | p=0.000                                                            |
|             | F24, S24 and S21R3 | No  | 26 | -      | -   | Kruskal-Wallis | -          | F24 - S24: p=0.003<br>F24 - S21R3: p=0.220<br>S24 - S21R3: p=0.537 |
|             | F28, S28 and S21R7 | No  | 30 | -      | -   | Kruskal-Wallis | -          | F28 - S28: p=0.002<br>F28 - S21R7: p=0.310<br>S28 - S21R7: p=0.037 |
| Figure 5 B  | F21 and S21        | Yes | 13 | 2.746  | Yes | t-test         | -          | p=0.029                                                            |
|             | F24, S24 and S21R3 | Yes | 26 | 12.225 | Yes | one-way ANOVA  | Bonferroni | F24 - S24: p=0.000<br>F24 - S21R3: p=0.629<br>S24 - S21R3: p=0.006 |
|             | F28, S28 and S21R7 | No  | 27 | -      | -   | Kruskal-Wallis | -          | F28 - S28: p=0.007<br>F28 - S21R7: p=0.447<br>S28 - S21R7: p=0.048 |
| Figure 5 C3 | F24, S24 and S21R3 | No  | 36 | -      | -   | Kruskal-Wallis | -          | p=0.490                                                            |
| Figure 6 A  | F21 and S21        | No  | 16 | -      | -   | Mann-Whitney U | -          | p=0.000                                                            |
|             | F24, S24 and S21R3 | No  | 26 | -      | -   | Kruskal-Wallis | -          | F24 - S24: p=0.000<br>F24 - S21R3: p=0.083<br>S24 - S21R3: p=0.069 |
|             | F28, S28 and S21R7 | No  | 30 | -      | -   | Kruskal-Wallis | -          | F28 - S28: p=0.000<br>F28 - S21R7: p=0.648<br>S28 - S21R7: p=0.002 |
| Figure 6 B  | F21 and S21        | Yes | 18 | 1.341  | Yes | t-test         | -          | p=0.070                                                            |

|            |                    |     |    |       |     |                |            |                                                                    |
|------------|--------------------|-----|----|-------|-----|----------------|------------|--------------------------------------------------------------------|
|            | F24, S24 and S21R3 | Yes | 28 | 8.845 | Yes | one-way ANOVA  | Bonferroni | F24 - S24: p=0.006<br>F24 - S21R3: p=1.000<br>S24 - S21R3: p=0.002 |
|            | F28, S28 and S21R7 | No  | 30 | -     | -   | Kruskal-Wallis | -          | p=0.121                                                            |
| Figure 6 C | F21 and S21        | Yes | 16 | 3.917 | Yes | t-test         | -          | p=0.084                                                            |
|            | F24, S24 and S21R3 | Yes | 28 | 1.723 | Yes | one-way ANOVA  | Bonferroni | F24 - S24: p=0.252<br>F24 - S21R3: p=0.576<br>S24 - S21R3: p=1.000 |
|            | F28, S28 and S21R7 | Yes | 29 | 3.629 | Yes | one-way ANOVA  | Bonferroni | F28 - S28: p=0.065<br>F28 - S21R7: p=1.000<br>S28 - S21R7: p=0.106 |
| Figure 6 D | F21 and S21        | No  | 20 | -     | -   | Mann-Whitney U | -          | p=0.063                                                            |
|            | F24, S24 and S21R3 | No  | 29 | -     | -   | Kruskal-Wallis | -          | p=0.141                                                            |
|            | F28, S28 and S21R7 | No  | 30 | -     | -   | Kruskal-Wallis | -          | F28 - S28: p=0.002<br>F28 - S21R7: p=0.703<br>S28 - S21R7: p=0.006 |
| Figure 6 E | F21 and S21        | Yes | 18 | 0.509 | Yes | t-test         | -          | p=0.003                                                            |
|            | F24, S24 and S21R3 | No  | 30 | -     | -   | Kruskal-Wallis | -          | F24 - S24: p=0.002<br>F24 - S21R3: p=0.521<br>S24 - S21R3: p=0.010 |
|            | F28, S28 and S21R7 | No  | 30 | -     | -   | Kruskal-Wallis | -          | F28 - S28: p=0.003<br>F28 - S21R7: p=0.461<br>S28 - S21R7: p=0.024 |
| Figure 6 F | F21 and S21        | Yes | 18 | 1.964 | Yes | t-test         | -          | p=0.001                                                            |

|            |                    |     |    |        |     |                |            |                                                                    |
|------------|--------------------|-----|----|--------|-----|----------------|------------|--------------------------------------------------------------------|
|            | F24, S24 and S21R3 | No  | 30 | -      | -   | Kruskal-Wallis | -          | F24 - S24: p=0.038<br>F24 - S21R3: p=0.046<br>S24 - S21R3: p=0.000 |
|            | F28, S28 and S21R7 | No  | 30 | -      | -   | Kruskal-Wallis | -          | F28 - S28: p=0.007<br>F28 - S21R7: p=0.477<br>S28 - S21R7: p=0.045 |
| Figure 7 A | F24, PBS-LPS       | Yes | 20 | 13.698 | No  | t-test         | -          | p=0.000                                                            |
|            | S24, PBS-LPS       | No  | 18 | -      | -   | Mann-Whitney U | -          | p=0.006                                                            |
|            | R24, PBS-LPS       | Yes | 22 | 6.391  | No  | t-test         | -          | p=0.0001                                                           |
|            | PBS                | No  | 30 | -      | -   | Kruskal-Wallis | -          | F24 - S24: p=0.007<br>F24 - S21R3: p=0.025<br>S24 - S21R3: p=0.564 |
|            | LPS                | No  | 32 | -      | -   | Kruskal-Wallis | -          | p=0.089                                                            |
| Figure 7 B | F24, PBS-LPS       | Yes | 20 | 0.528  | Yes | t-test         | -          | p=0.009                                                            |
|            | S24, PBS-LPS       | Yes | 16 | 2.551  | Yes | t-test         | -          | p=0.248                                                            |
|            | R24, PBS-LPS       | No  | 18 | -      | -   | Mann-Whitney U | -          | p=0.004                                                            |
|            | PBS                | Yes | 31 | 6.225  | Yes | one-way ANOVA  | Bonferroni | F24 - S24: p=0.159<br>F24 - S21R3: p=0.503<br>S24 - S21R3: p=0.004 |
|            | LPS                | Yes | 31 | 0.673  | Yes | one-way ANOVA  | Bonferroni | F24 - S24: p=1.000<br>F24 - S21R3: p=1.000<br>S24 - S21R3: p=0.827 |
| Figure 7 C | F24, PBS-LPS       | Yes | 20 | 0.396  | Yes | t-test         | -          | p=0.718                                                            |
|            | S24, PBS-LPS       | No  | 18 | -      | -   | Mann-Whitney U | -          | p=0.055                                                            |
|            | R24, PBS-LPS       | No  | 18 | -      | -   | Mann-Whitney U | -          | p=1.000                                                            |
|            | PBS                | No  | 32 | -      | -   | Kruskal-Wallis | -          | p=0.055                                                            |

|  |     |    |    |   |   |                |   |                                                                    |
|--|-----|----|----|---|---|----------------|---|--------------------------------------------------------------------|
|  | LPS | No | 32 | - | - | Kruskal-Wallis | - | F24 - S24: p=0.235<br>F24 - S21R3: p=0.041<br>S24 - S21R3: p=0.003 |
|--|-----|----|----|---|---|----------------|---|--------------------------------------------------------------------|
